# Supplementary material for: Simulating the impact of changing trends in smoking and obesity on productivity of an industrial population: an observational study
Source: PubMed Central journal article supplement — BMJ Open. 2014 Apr 19;4(4):e004788. doi: 10.1136/bmjopen-2014-004788 (PMC3996817; doi:10.1136/bmjopen-2014-004788), 2014-04-19
Supplement: bmjopen-2014-004788.draft_revisions.pdf [file bmjopen-2014-004788.draft_revisions.pdf]

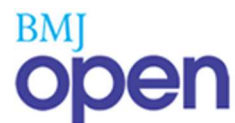

**Impact of changing trends in smoking and obesity on the productivity of an industrial population**

|                                 |                                                                                                                                                                                                                                                 |
|---------------------------------|-------------------------------------------------------------------------------------------------------------------------------------------------------------------------------------------------------------------------------------------------|
| Journal:                        | <i>BMJ Open</i>                                                                                                                                                                                                                                 |
| Manuscript ID:                  | bmjopen-2014-004788                                                                                                                                                                                                                             |
| Article Type:                   | Research                                                                                                                                                                                                                                        |
| Date Submitted by the Author:   | 02-Jan-2014                                                                                                                                                                                                                                     |
| Complete List of Authors:       | Tsai, Shan; Shell Oil Company, Corporate Health Department; Shell Oil Company, Shell Health<br>Bhojani, Faiyaz; Shell Oil Company, Shell Health<br>Wendt, Judy; Shell Oil Company, Shell Health<br>Koller, Kim; Shell Oil Company, Shell Health |
| <b>Primary Subject Heading</b>: | Occupational and environmental medicine                                                                                                                                                                                                         |
| Secondary Subject Heading:      | Public health, Occupational and environmental medicine                                                                                                                                                                                          |
| Keywords:                       | Epidemiology < TROPICAL MEDICINE, OCCUPATIONAL & INDUSTRIAL MEDICINE, PUBLIC HEALTH                                                                                                                                                             |
|                                 |                                                                                                                                                                                                                                                 |

SCHOLARONE™  
Manuscripts

1  
2  
3 Impact of changing trends in smoking and obesity on the productivity of an industrial population  
4  
5  
6  
7  
8

9 Shan P. Tsai, PhD\*

10  
11 Faiyaz A. Bhojani, MD, DrPH

12  
13  
14 Judy K. Wendt, PhD

15  
16  
17  
18 Kim L. Koller, MD

19  
20  
21  
22  
23 Shell Oil Company, Houston, Texas, USA

24  
25  
26 Shell Health

27  
28  
29 One Shell Plaza

30  
31  
32 P.O. Box 2463

33  
34  
35 Telephone (713) 241-6078

36  
37  
38 Fax (713) 241-5875

39  
40  
41 \*corresponding author

42  
43  
44  
45  
46 **Running Title:** Obesity and Smoking on Productivity

47  
48  
49 **Keywords:** obesity, smoking, productivity

50  
51  
52 **Word count:** 2,209

## ABSTRACT

**Objective:** To examine the impact of changing trends in smoking and obesity on productivity loss among 20,000 petrochemical employees from 1980 to 2009.

**Methods:** Smoking and obesity information were collected during company physical examinations. Productivity loss was calculated as differential workdays lost between smokers and non-smokers, and obese and normal weight employees.

**Results:** During 1980-2009, smoking prevalence decreased from 32% to 17%, while obesity prevalence increased from 15% to 42%. In 1982, lost productivity from obesity was an estimated 8,520 days, and for smoking, 12,960 days, but by 1987, workdays lost due to obesity exceeded that attributable to smoking. In 2007, workdays lost from obesity was 3.7 times higher than for smoking.

**Conclusion:** The productivity impact to employers from obesity will continue to rise without effective measures supporting employee efforts to achieve healthy weight through sustainable lifestyle changes.

### Strengths and limitations of this study

- Large study population and followed for more than 30 years
- Clinical assessment of BMI and smoking status, i.e., data were collected during physical examination
- Prevalence rates for smoking and obesity were adjusted by gender and work status
- Unavailability of actual company absence data to use in lost productivity estimates

## INTRODUCTION

Smoking and obesity are two major health risk factors facing many populations today. The impact of these factors in the workplace is an issue beyond personal health. Obesity is a major contributor to productivity loss for U.S. business; an estimated \$43 billion per year.[1] The health hazards of smoking have received the most public attention among major lifestyle risks in the last 40 years due in part to the publicity of the annual U.S. Surgeon General's reports on smoking from the 1960s.[2] As a result, smoking prevalence among American adults over the last 40 years has steadily declined from 37.4% in 1970,[3] to 22.5% in 2002[4] and to 20.6% in 2008.[5] Factors contributing to the decrease include smoking bans, media campaigns against smoking, higher cigarette taxes and insurance coverage for smoking cessation programs.[2, 6] On the other hand, there has been a large rise in obesity prevalence over the same period. The prevalence of obesity for Americans over the age of 20 years has increased from 14.6% in 1971-1974,[7] to 30% in 2002[7] and to 34% in 2008.[8]

Productivity loss attributable to smoking and obesity is important to industry. Several studies have reported that smoking employees have substantially greater absenteeism than non-smoking employees. Based on a survey of cigarette smoking and sick leave at a large petrochemical complex in China, Wang and Dobson reported that on average, smokers missed three additional workdays due to illness each year than non-smokers.[9] Tsai and colleagues examined employees at several Shell Oil Company facilities and estimated an excess sick leave of approximately three days among smokers.[10] Other studies have reported that smokers miss more workdays than non-smokers, ranging from 0.9 to 13.5 days, with an average excess of 2.1 sick days.[11-13]

1  
2  
3 A relatively small number of studies have attempted to examine the relationship between  
4 obesity and duration of illness absence. Based on a 10-year follow-up study in the United States,  
5 obese employees of a petrochemical company missed an average of 3.7 extra workdays per year  
6 compared to normal weight persons.[14] A study conducted on employees from London  
7  
8 Underground Ltd reported that obese persons typically took an extra four days of sick leave  
9  
10 every year compared to normal weight persons,[15] and a prospective study of a Dutch working  
11  
12 population reported that obese employees were absent 14 days more per year than normal-weight  
13  
14 employees.[16] In a recent systematic review, Neovius and colleagues reported that obese  
15  
16 American workers had approximately one to three additional illness absence days per year, and  
17  
18 obese European workers had about 10 additional days compared with their respective normal  
19  
20 weight counterparts.[17]

21  
22 While numerous studies have been conducted on various health and economic impacts of  
23  
24 smoking trends,[2] studies on the impact of increasing obesity prevalence over time, particularly  
25  
26 related to illness absence in working populations, have been limited. In recent years,  
27  
28 comparisons of the long-term effect of obesity and smoking on mortality have been reported;[18-  
29  
30 20] however the short-term effect of obesity on productivity has rarely been quantified.[21] This  
31  
32 lack of comparable studies is due in part to the relatively “new” risk status of obesity as  
33  
34 compared to the long established risk status of smoking. Similar to smoking, obesity is  
35  
36 associated with increasing health care costs, productivity loss and risk of various chronic  
37  
38 diseases such as cardiovascular disease, cancer, diabetes, hypertension and osteoarthritis,[17, 22-  
39  
40 23] and even modest weight reduction can have substantial lifetime health and economic  
41  
42 benefits.[24]

1  
2  
3 The purpose of this paper is to examine the changing trends in smoking and obesity  
4 prevalence during a 30-year period (1980 to 2009) in a population of petrochemical workers, and  
5 compare and quantify the resulting impact on productivity due to these two risk factors.  
6  
7  
8  
9

## 10 **METHODS**

11  
12  
13 Smoking and obesity prevalence data were extracted from physical examination records  
14 in the Shell Health Surveillance System (HSS), the data system used in the Company's ongoing  
15 monitoring of employee health.[25-26] The HSS comprises demographic, work history, illness  
16 absence and physical examination (i.e., health history, pre-placement, periodic examinations)  
17 data for all U.S. employees since 1978. The frequency of periodic examinations ranged from  
18 once every year to once every five years, depending on the type of examination and age of the  
19 employee. For several large refinery and petrochemical locations, data were also available for  
20 1976-1977.  
21  
22  
23  
24  
25  
26  
27  
28  
29  
30  
31  
32

33 Data on smoking was collected during the physical examinations along with other  
34 medical history information. Responses to smoking history questions were used to determine the  
35 smoking status of each employee (i.e., current smoker, former smoker or non-smoker). A  
36 current smoker was defined as a person who currently smoked (i.e., responded yes to a question  
37 about smoking cigarettes) and who had smoked 100 or more cigarettes during his/her lifetime.  
38 This definition is consistent with that used by the U.S. Centers for Disease Control and  
39 Prevention in the National Health Interview Survey. Height and weight measurements for each  
40 employee were taken at the time of physical examination. Body mass index (BMI) was  
41 calculated as  $BMI = \text{weight (kg)} / \text{height}^2 \text{ (m)}$ . Normal weight was defined as BMI between 18.5  
42 and 24.9 kg/m<sup>2</sup> and obesity as BMI of 30 kg/m<sup>2</sup> or greater.  
43  
44  
45  
46  
47  
48  
49  
50  
51  
52  
53  
54  
55  
56  
57  
58  
59  
60

1  
2  
3  
4  
5  
6  
7  
8  
9  
10  
11  
12  
13  
14  
15  
16  
17  
18  
19  
20  
21  
22  
23  
24  
25  
26  
27  
28  
29  
30  
31  
32  
33  
34  
35  
36  
37  
38  
39  
40  
41  
42  
43  
44  
45  
46  
47  
48  
49  
50  
51  
52  
53  
54  
55  
56  
57  
58  
59  
60

Approximately 6,200 employees had BMI data in 1980-1984, 7,000 in 1985-1989, 8,000 in 1990-1994, 9,500 in 1995-1999, 14,000 in 2000-2004, and 6,500 in 2005-2009. Over 85% of these employees also had smoking data. The substantially reduced number of examinations in 2005-2009 was due to a change in company policy in 2007 which limited the scope of company periodic examinations. The latest examination containing smoking and BMI information during each of six periods (1980-1984, 1985-1989, 1990-1994, 1995-1999, 2000-2004, 2005-2009) was used in the analysis. The value for the mid-year of each of the above five-year time period, i.e., 1982, 1987, 1992, 1997, 2002, 2007, represents an average for that period. The total numbers of employees during the study period ranged from 20,000 to 28,000, and we assumed an employee count of 20,000 to calculate the impact of smoking and obesity on the absolute value of lost workdays.

Illness absence data is one of the major components of the HSS. While employee illness absence events were consistently recorded for employees who had absences lasting five days or more during the study period, they were incomplete for absences less than five days, especially during the 1980s and 1990s. Therefore, the actual company absence data is not able to fully describe the impact on productivity. As an alternative, and based on our review of the relevant literature described earlier, we used a conservative estimate of two additional sick days per year for smokers and three additional sick days per year for obese persons in the calculation of productivity loss. We also performed two sensitivity analyses to assess a range of possible values for productivity loss when different assumptions are used for excess days lost due to obesity and smoking. The first used two extra sick days for both smokers and obese persons, and the second used three extra sick days for smokers and two extra sick days for obese persons.

1  
2  
3  
4  
5  
6  
7  
8  
9  
10  
11  
12  
13  
14  
15  
16  
17  
18  
19  
20  
21  
22  
23  
24  
25  
26  
27  
28  
29  
30  
31  
32  
33  
34  
35  
36  
37  
38  
39  
40  
41  
42  
43  
44  
45  
46  
47  
48  
49  
50  
51  
52  
53  
54  
55  
56  
57  
58  
59  
60

Directly adjusted prevalence rates for smoking and obesity by gender and work status (production/staff) for the six time periods were computed with the distribution of gender and work status of the last time period, i.e., 2005-2009, as the standard. This standardization was done due to the varying proportions of male and female, and production and staff employees who took physical examinations over the study period. All statistical analyses were carried out using SAS System Software version 8.2.

There is no additional data available for the study. This study is considered to be a routine Health Department activity of which employees are kept informed. The smoking and body mass index data for this study were extracted from our Health Surveillance system. No follow-back investigations or contact with employees were performed. For these reasons, the study was not reviewed by an ethics committee and no informed consent was requested from employees.

## RESULTS

Prevalence of cigarette smoking among Shell employees during the last 30 years has gradually decreased. Approximately one-third (32.4%) of employees smoked in 1982; however there was a large decline during the subsequent 15 years. Smoking prevalence decreased to 20.4% by 1997 and gradually leveled off to 17.0% in 2007 (Figure 1). Conversely, the proportion of obese employees increased steadily during this period. In the 1980s, the prevalence of obesity was less than 20% (14.2% in 1982 and 19.9% in 1987). However, the rate climbed considerably by early 2000s, almost doubling to 38.9%. The prevalence of obesity reached the same level as smoking, approximately 24%, around 1990. By 2007, 42% of our employee population was obese.



Table 1 shows the changing trends of workdays lost attributable to smoking and obesity, using an average of two extra sick days for smokers and three extra days for obese persons for a workforce of 20,000 employees. The productivity loss in terms of excess absenteeism was estimated to be 8,520 days for obesity and 12,960 days for smoking in 1982, with a ratio of 0.66. By 1987, workdays lost due to obesity exceeded those attributable to smoking, with 11,940 excess workdays lost from obesity and 9,920 days from smoking, and this pattern continued through the duration of the study period. The contribution of obesity to workdays lost increased dramatically beginning in the early 1990s and was 3.7-fold higher than smoking by 2007, with 25,440 and 6,800 workdays lost due to obesity and smoking, respectively.

**Table 1.** Prevalence of obesity and smoking and their impact on estimated excess workdays lost in a workforce of 20,000 Shell Oil Company employees, 1980-2009.

|                      | 1982*  | 1987*  | 1992*  | 1997*  | 2002*  | 2007*  |
|----------------------|--------|--------|--------|--------|--------|--------|
| Prevalence (%)       |        |        |        |        |        |        |
| Obesity              | 14.2   | 19.9   | 27.8   | 35.4   | 38.9   | 42.4   |
| Smoking              | 32.4   | 24.8   | 22.0   | 20.4   | 17.3   | 17.0   |
| Excess Workdays Lost |        |        |        |        |        |        |
| Obesity              | 8,520  | 11,940 | 16,680 | 21,240 | 23,340 | 25,440 |
| Smoking              | 12,960 | 9,920  | 8,800  | 8,160  | 6,920  | 6,800  |
| Ratio                | 0.66   | 1.20   | 1.90   | 2.60   | 3.37   | 3.74   |

\*Mid-year for each of the corresponding periods: 1980-1984, 1985-1989, 1990-1994, 1995-1999, 2000-2004, and 2005-2009.

We also conducted two sensitivity analyses using different assumptions for excess days lost for smokers and obese employees by varying the number of additional sick days due to these risk factors, i.e., (1) two extra days for both obesity and smoking, and (2) two extra days for obesity and three extra days for smoking. As shown in Table 2, the patterns did not change although the productivity loss due to obesity did not exceed that of smoking until the 1990s.

**Table 2.** Range of estimated excess workdays lost due to obesity and smoking based on alternative assumptions for differential productivity loss in a workforce of 20,000 Shell Oil Company employees, 1980-2009.

|                                                                 | 1982*  | 1987* | 1992*  | 1997*  | 2002*  | 2007*  |
|-----------------------------------------------------------------|--------|-------|--------|--------|--------|--------|
| <i>Excess Workdays Lost: Obesity (2 days), Smoking (2 days)</i> |        |       |        |        |        |        |
| Obesity                                                         | 5,680  | 7,960 | 11,120 | 14,160 | 15,560 | 16,960 |
| Smoking                                                         | 12,960 | 9,920 | 8,800  | 8,160  | 6,920  | 6,800  |
| Ratio                                                           | 0.44   | 0.80  | 1.26   | 1.74   | 2.25   | 2.50   |

*Excess Workdays Lost: Obesity (2 days), Smoking (3 days)*

|         |        |        |        |        |        |        |
|---------|--------|--------|--------|--------|--------|--------|
| Obesity | 5,680  | 7,960  | 11,120 | 14,160 | 15,560 | 16,960 |
| Smoking | 19,440 | 14,880 | 13,200 | 12,240 | 10,380 | 10,200 |
| Ratio   | 0.29   | 0.53   | 0.84   | 1.16   | 1.50   | 1.66   |

---

\*Mid-year for each of the corresponding periods: 1980-1984, 1985-1989, 1990-1994, 1995-1999, 2000-2004, 2005-2009.

## DISCUSSION

This is the first study examining the impact of changing trends in the prevalence of smoking and obesity on productivity in a population of industrial workers. In the early 1980s, workdays lost attributable to obesity was 34% lower than smoking; however by 2007 it was 3.7 times higher. The negative effect of increasing obesity rates on productivity of this workforce surpassed that of smoking as early as 1987.

The changing patterns of obesity and smoking over the last 30 years in this population are similar to that of the general population of the United States.[27] Prevalence of obesity among our employees increased from 14% in the early 1980s to 42% in 2007 while prevalence of smoking decreased from 32% to 17%. Factors attributable to the decline in smoking prevalence of this working population have been discussed in an earlier paper.[28] However, reasons for the persistently increasing prevalence of obesity are not immediately clear. It is possible that the decline of smoking has led to an increase in obesity, since smoking is associated with lower body weight and smoking cessation is associated with weight gain.[27, 29-30] One study has suggested that a reduction in smoking prevalence has been linked to an increase in obesity,[29] however, this finding was not confirmed by other researchers investigating the same issue but

1  
2  
3 with different methodology.[27] A recent study conducted by Flegal of the U.S. National Center  
4  
5 for Health Statistics found that decreasing rates of cigarette smoking probably had only a small  
6  
7 effect, less than 1%, on increasing rates of obesity in the U.S. population.[30] Therefore, it is  
8  
9 unlikely that the increased rates of obesity in this workforce were attributed to the decreasing  
10  
11 rates of smoking.  
12  
13

14  
15 One limitation of our study was the unavailability of actual company absence data to use  
16  
17 in lost productivity estimates. Although absence data was collected throughout the 30-year  
18  
19 follow-up period, variability in company absence reporting requirements resulted in only longer  
20  
21 absences (6+ days) collected in earlier years and all absences (regardless of length) collected in  
22  
23 the latter part of the study period. In addition, divestments and acquisitions of businesses and  
24  
25 sites meant that the composition of the study population changed over time. Given these  
26  
27 inconsistencies, and length of the study period, we relied upon more stable published estimates  
28  
29 of incremental days lost in our calculations.  
30  
31  
32  
33  
34

35 Estimates of lost productivity attributable to obesity and smoking are highly dependent  
36  
37 on assumptions regarding differential sick days between obese and normal weight persons and  
38  
39 between smokers and non-smokers. In the calculation of workdays lost we used three additional  
40  
41 sick days per year for obese persons and two additional days for smokers, based on existing  
42  
43 literature. These estimates seem reasonable given that compared to smoking, obesity has a much  
44  
45 larger contribution to the development of chronic conditions, and spending on health care and  
46  
47 medications.[21]  
48  
49  
50  
51

52 Another limitation of this study is its inability to assess potential confounders. Illness  
53  
54 absence in a working population is a complex phenomenon including many factors, such as diet,  
55  
56 physical activity, personal health risk factors and work-related factors.[31-33] However, the  
57  
58  
59  
60

1  
2  
3 strength of the study lies in the large population, followed for more than 30 years, with clinical  
4  
5 assessment of BMI and smoking status.  
6  
7

8  
9 While reducing the prevalence of obesity will clearly lead to a reduction in premature  
10 mortality and increased productivity, these will not happen immediately. In our workforce, we  
11 have initiated health programs and interventions aimed at creating a positive and supportive  
12 environment for employees attempting to increase their physical activity (i.e., exercise rooms,  
13 walking trails), and reduce weight (i.e., healthy food offerings at work). We have also  
14 redesigned company health insurance programs to promote preventive care and reward wellness  
15 activities. These programs represent the efforts of both health and benefits leaders, and are  
16 reinforced by onsite and online educational activities, and role-modeling and support by site  
17 leadership. The earlier weight management and health promotion programs are introduced, the  
18 sooner employees and employers will reap their benefits. These programs should be an urgent  
19 and joint priority of corporate health leaders and benefits managers to achieve sustainable change  
20 in employee health behaviors, and minimize the future impact of obesity on employee  
21 productivity.  
22  
23  
24  
25  
26  
27  
28  
29  
30  
31  
32  
33  
34  
35  
36  
37  
38  
39  
40  
41  
42

### 43 **What this paper adds**

- 44  
45 ➤ Obesity has steadily increased while cigarette smoking decreased over the last 30 years in  
46 this working population.  
47
- 48  
49 ➤ The productivity loss attributable to obesity, in terms of excess absenteeism, was 2/3 of  
50 that of smoking in the early 1980. However, the loss of productivity from obesity  
51 steadily increased in the next 25 years, and by the late 2000s, workdays lost from obesity  
52 was 3.7 times higher than that for smoking.  
53  
54  
55  
56  
57  
58  
59  
60

- 1  
2  
3  
4  
5  
6  
7  
8  
9  
10  
11  
12  
13  
14  
15  
16  
17  
18  
19  
20  
21  
22  
23  
24  
25  
26  
27  
28  
29  
30  
31  
32  
33  
34  
35  
36  
37  
38  
39  
40  
41  
42  
43  
44  
45  
46  
47  
48  
49  
50  
51  
52  
53  
54  
55  
56  
57  
58  
59  
60
- The productivity impact to employees from obesity will continue to rise without effective measures supporting employee efforts to achieve healthy weight through sustainable lifestyle changes.

The authors declare they have no actual or potential competing financial interests.

**Abbreviations:** HSS, Health Surveillance System; BMI, body mass index

**Contributors:** FAB, SPT developed the aim and scope of the study. SPT and JKW carried out the statistical analysis. All authors contributed to the interpretations and to the final manuscript.

**Data sharing:** no additional data available.

**Competing Interests:** None

## REFERENCES

1. Finkelstein EA, DiBonaventura MD, Burgess SM, et al. The costs of obesity in the workplace. *J Occup Environ Med* 2010; **52**:971-976.
2. Centers for Disease Control and Prevention. Smoking and Tobacco Use: History of the Surgeon General's Report on Smoking and Health.  
[http://www.cdc.gov/tobacco/data\\_statistics/sgr/history/index.htm](http://www.cdc.gov/tobacco/data_statistics/sgr/history/index.htm). Date accessed: 12/11/2013.
3. Mendez D, Warner K. Adult cigarette smoking prevalence: declining as expected (not as desired). *Am J Public Health* 2004;**94**:251-252.
4. Centers for Disease Control and Prevention. Cigarette smoking among adults – United States, 2000. *MMWR* 2002;**51**:642-645.
5. Centers for Disease Control and Prevention. Cigarette smoking among adults and trends in smoking cessation – United States, 2008. *MMWR* 2009;**58**:1227-1232.
6. Cokkinides V, Bandi P, McMahon C, et al. Tobacco control in the United States – recent progress and opportunities. *Ca Cancer J Clin* 2009;**59**:352-365.
7. Flegal KM, Carroll MD, Ogden CL, et al. Prevalence and trends in obesity among US adults, 1999-2000. *JAMA* 2002;**288**:1723-1727.
8. Flegal KM, Carroll MD, Ogden CL, et al. Prevalence and trends in obesity among US adults, 1999-2008. *JAMA* 2010;**303**:235-241.
9. Wang WQ, Dobson AJ. Cigarette smoking and sick leave in an industrial population in Shanghai, China. *Int J Epidemiol* 1992;**21**:293-297.

- 1  
2  
3 10. Tsai SP, Gilstrap EL, Colangelo TA, et al. Illness absence at an oil refinery and  
4  
5 petrochemical plant. *J Occup Environ Med* 1997;**39**:455-462.  
6  
7
- 8  
9 11. Bertera RL. The effect of behavioral risks and health-care cost in the workplace. *J Occup*  
10  
11 *Med* 1991;**33**:1119-1124.  
12  
13
- 14 12. Kelloway EK, Barling J, Weber C. Smoking and absence from work- a Quantitative  
15  
16 review. In M. Koslowsky and M. Krausz (eds.) *Voluntary Employee Withdrawal and*  
17  
18 *Inattendance*. New York: Kluwer Academic/Plenum 2002;167-178.  
19  
20
- 21 13. Tsai SP, Wendt JK, Ahmed FS, et al. Illness absence patterns among employees in a  
22  
23 petrochemical facility: impact of selected health risk factors. *J Occup Environ Med*  
24  
25 2005;**47**:838-846.  
26  
27
- 28  
29 14. Tsai SP, Ahmed FS, Wendt JK, et al. The impact of obesity on illness absence and  
30  
31 productivity in an industrial population of petrochemical workers. *Ann Epidemiol*  
32  
33 2008;**18**:8-14.  
34  
35
- 36  
37 15. Harvey SB, Glozier N, Carlton O, et al. Obesity and sickness absence: results from the  
38  
39 CHAP study. *Occup Med (Lond)* 2010;**60**:362-8.  
40  
41
- 42 16. Jans MP, van den Heuvel SG, Hildebrandt VH, et al. Overweight and obesity as predictors  
43  
44 of absenteeism in the working population of the Netherlands. *J Occup Environ Med*  
45  
46 2007;**49**:975-980.  
47  
48
- 49  
50 17. Neovius K, Johansson K, Kark M, et al. Obesity status and sick leave: a systematic  
51  
52 review. *Obesity Review* 2009;**10**:17-27.  
53  
54
- 55 18. Stewart ST, Cutler DM, Rosen AB. Forecasting the effects of obesity and smoking on  
56  
57 U.S. life expectancy. *N Engl J Med* 2009;**361**:2252-2260.  
58  
59  
60



- 1  
2  
3  
4 19. Mokdad AH, Marks JS, Stroup DF, et al. Actual causes of death in the United States,  
5  
6 2000. JAMA 2004;**291**:1238-1245.  
7  
8  
9 20. Flegal KM, Grubard BI, Williamson DF, et al. Excess deaths associated with underweight,  
10  
11 overweight, and obesity. JAMA 2005;**293**:1861-1867.  
12  
13  
14 21. Sturm R. The effects of obesity, smoking, and drinking on medical problems and costs.  
15  
16 Health Affairs 2002;**21**:245-253.  
17  
18  
19 22. World Health Organization (WHO). Obesity: Preventing and Managing the Global  
20  
21 Epidemic. Report of a WHO Consultation. World Health Organization: Geneva, 2004.  
22  
23  
24 23. Thompson D, Edelsberg J, Kinsey KL, et al. Estimated economic costs of obesity to U.S.  
25  
26 business. Am J Health Promt. 1998;**13**:120-127.  
27  
28  
29 24. Orzano AJ, Scott JG. Diagnosis and treatment of obesity in adults: an applied evidence-  
30  
31 based review. J Am Board Fam Pract 2004;**17**:359-369.  
32  
33  
34 25. Joyner RE, Pack PH. The Shell Oil Company's computerized health surveillance system. J  
35  
36 Occup Med 1982;**24**:812-814.  
37  
38  
39 26. Tsai SP, Dowd CM, Cowles SR, et al. Prospective morbidity surveillance of Shell refinery  
40  
41 and petrochemical employees. Br J Ind Med 1991;**48**:155-163.  
42  
43  
44 27. Gruber J, Frakes M. Does falling smoking lead to rising obesity? J Health Economic  
45  
46 2006;**25**:183-197.  
47  
48  
49 28. Tsai SP, Wendt JK, Hunter RB. Trends in cigarette smoking among refinery and  
50  
51 petrochemical plant employees with a discussion of the potential impact on lung cancer.  
52  
53 Int Arch Occup Environ Health 2001;**74**:477-482.  
54  
55  
56  
57  
58  
59  
60

- 1  
2  
3  
4  
5  
6  
7  
8  
9  
10  
11  
12  
13  
14  
15  
16  
17  
18  
19  
20  
21  
22  
23  
24  
25  
26  
27  
28  
29  
30  
31  
32  
33  
34  
35  
36  
37  
38  
39  
40  
41  
42  
43  
44  
45  
46  
47  
48  
49  
50  
51  
52  
53  
54  
55  
56  
57  
58  
59  
60
29. Chou SY, Grossman M, Saffer H. An economic analysis of adult obesity: results from the behavioral risk factor surveillance system. *J Health Economic* 2004;**23**:565-587.
30. Flegal KM. The effect of changes in smoking prevalence on obesity prevalence in the United States. *Am J Public Health* 2007;**97**:1510-1514.
31. Alavanja SM, van der Berg TIJ, van Duivenbooden C, et al. Impact of work-related factors, lifestyle, and work ability on sickness absence among Dutch construction workers. *Scan J Work Environ Health* 2009;**35**:325-333.
32. Laaksonen M, Piha K, Martikainen P, et al. Health-related behaviours and sickness absence from work. *Occup Environ Med* 2009;**66**:840-847.
33. Labriola M, Lund T, Burr H. Prospective study of physical and psychosocial risk factors for sickness absence. *Occup Med* 2006;**56**:469-474.

Figure 1. Changing trends in prevalence of smoking and obesity in the Shell workforce, 1980-2009.

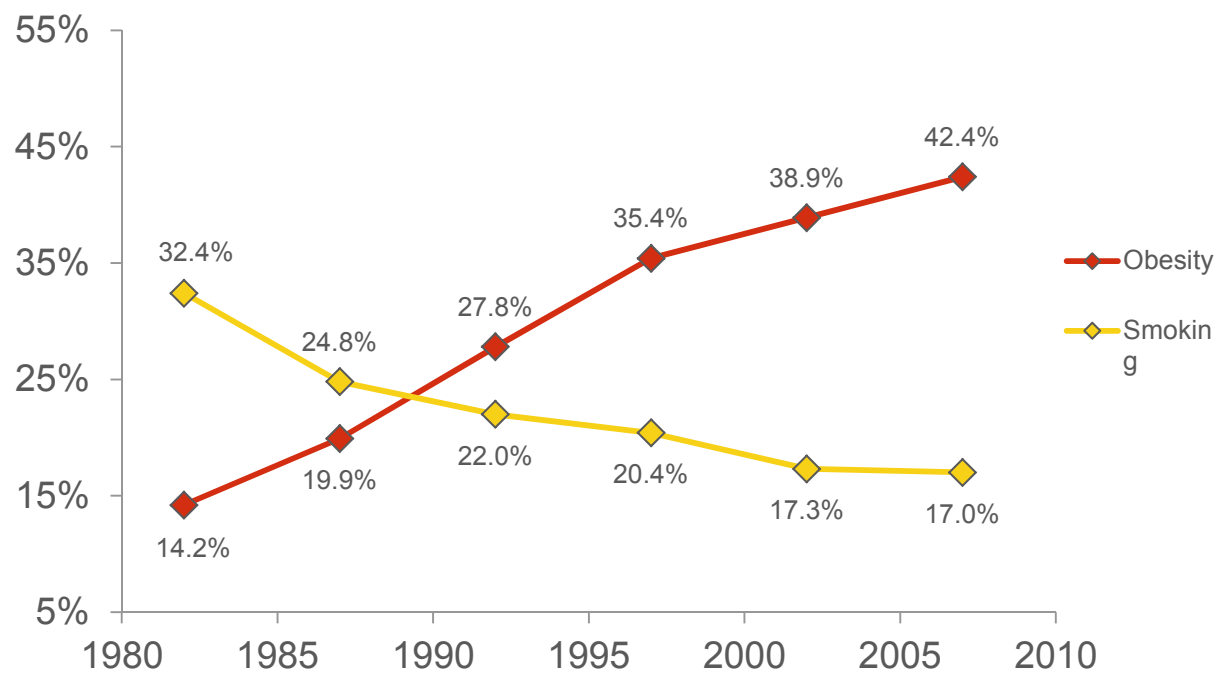

# BMJ Open

## Simulating the impact of changing trends in smoking and obesity on productivity of an industrial population - an observational study

|                                 |                                                                                                                                                                                                                                                 |
|---------------------------------|-------------------------------------------------------------------------------------------------------------------------------------------------------------------------------------------------------------------------------------------------|
| Journal:                        | <i>BMJ Open</i>                                                                                                                                                                                                                                 |
| Manuscript ID:                  | bmjopen-2014-004788.R1                                                                                                                                                                                                                          |
| Article Type:                   | Research                                                                                                                                                                                                                                        |
| Date Submitted by the Author:   | 07-Mar-2014                                                                                                                                                                                                                                     |
| Complete List of Authors:       | Bhojani, Faiyaz; Shell Oil Company, Shell Health<br>Tsai, Shan; Shell Oil Company, Corporate Health Department; Shell Oil Company, Shell Health<br>Wendt, Judy; Shell Oil Company, Shell Health<br>Koller, Kim; Shell Oil Company, Shell Health |
| <b>Primary Subject Heading</b>: | Occupational and environmental medicine                                                                                                                                                                                                         |
| Secondary Subject Heading:      | Public health, Occupational and environmental medicine                                                                                                                                                                                          |
| Keywords:                       | Epidemiology < TROPICAL MEDICINE, OCCUPATIONAL & INDUSTRIAL MEDICINE, PUBLIC HEALTH                                                                                                                                                             |
|                                 |                                                                                                                                                                                                                                                 |

SCHOLARONE™  
Manuscripts

1  
2  
3 Simulating the impact of changing trends in smoking and obesity on productivity of an industrial  
4 population - an observational study  
5  
6  
7  
8  
9  
10

11 Faiyaz A. Bhojani, MD, DrPH

12  
13  
14 Shan P. Tsai, PhD\*

15  
16  
17 Judy K. Wendt, PhD

18  
19  
20 Kim L. Koller, MD

21  
22  
23  
24  
25  
26 Shell Oil Company, Houston, Texas, USA

27  
28  
29 Shell Health

30  
31  
32 One Shell Plaza

33  
34  
35 P.O. Box 2463

36  
37  
38 Telephone (713) 241-6078

39  
40  
41 Fax (713) 241-5875

42  
43  
44 \*corresponding author

45  
46  
47  
48  
49 **Running Title:** Obesity and Smoking on Productivity

50  
51  
52 **Keywords:** obesity, smoking, productivity

## ABSTRACT

**Objective:** To estimate the impact of trends in smoking and obesity prevalence on productivity loss among petrochemical employees from 1980 to 2009.

**Methods:** Smoking and obesity information were collected during company physical examinations. Productivity loss was calculated as differential workdays lost between smokers and non-smokers, and obese and normal weight employees.

**Results:** During 1980-2009, smoking prevalence decreased from 32% to 17%, while obesity prevalence increased from 14% to 42%. In 1982, lost productivity from obesity was an estimated 43 days per 100 employees, and for smoking, 65 days per 100 employees, but by 1987, workdays lost due to obesity exceeded that attributable to smoking. In 2007, workdays lost from obesity was 3.7 times higher than for smoking.

**Conclusion:** Because of the increasing trend in obesity, the productivity impact to employers from obesity will continue to rise without effective measures supporting employee efforts to achieve healthy weight through sustainable lifestyle changes.

### Strengths and limitations of this study

- Large study population and followed for more than 30 years
- Clinical assessment of BMI and smoking status, i.e., data were collected during physical examination
- Prevalence rates for smoking and obesity were adjusted by gender and work status
- Unavailability of actual company absence data to use in lost productivity estimates

## INTRODUCTION

Smoking and obesity are two major health risk factors facing many populations today. The impact of these factors in the workplace is an issue beyond personal health. Obesity is a major contributor to productivity loss for U.S. business; an estimated \$43 billion per year.[1] The health hazards of smoking have received the most public attention among major lifestyle risks in the last 40 years due in part to the publicity of the annual U.S. Surgeon General's reports on smoking from the 1960s.[2] As a result, smoking prevalence among American adults over the last 40 years has steadily declined from 37.4% in 1970,[3] to 22.5% in 2002[4] and to 20.6% in 2008.[5] Factors contributing to the decrease include smoking bans, media campaigns against smoking, higher cigarette taxes and insurance coverage for smoking cessation programs.[2, 6] On the other hand, there has been a large rise in obesity prevalence over the same period. The prevalence of obesity for Americans over the age of 20 years has increased from 14.6% in 1971-1974,[7] to 30% in 2002[7] and to 34% in 2008.[8]

Productivity loss attributable to smoking and obesity is important to industry. Several studies have reported that smoking employees have substantially greater absenteeism than non-smoking employees. Based on a survey of cigarette smoking and sick leave at a large petrochemical complex in China, Wang and Dobson reported that on average, smokers missed three additional workdays due to illness each year than non-smokers.[9] Tsai and colleagues examined employees at several Shell Oil Company facilities and estimated an excess sick leave of approximately three days among smokers.[10] Other studies have reported that smokers miss more workdays than non-smokers, ranging from 0.9 to 13.5 days, with an average excess of 2.1 sick days.[11-13]

1  
2  
3 A relatively small number of studies have attempted to examine the relationship between  
4 obesity and duration of illness absence. Based on a 10-year follow-up study in the United States,  
5 obese employees of a petrochemical company missed an average of 3.7 extra workdays per year  
6 compared to normal weight persons.[14] A study conducted on employees from London  
7  
8 Underground Ltd reported that obese persons typically took an extra four days of sick leave  
9  
10 every year compared to normal weight persons,[15] and a prospective study of a Dutch working  
11  
12 population reported that obese employees were absent 14 days more per year than normal-weight  
13  
14 employees.[16] In a recent systematic review, Neovius and colleagues reported that obese  
15  
16 American workers had approximately one to three additional illness absence days per year, and  
17  
18 obese European workers had about 10 additional days compared with their respective normal  
19  
20 weight counterparts.[17]

21  
22 While numerous studies have been conducted on various health and economic impacts of  
23  
24 smoking trends,[2] studies on the impact of increasing obesity prevalence over time, particularly  
25  
26 related to illness absence in working populations, have been limited. In recent years,  
27  
28 comparisons of the long-term effect of obesity and smoking on mortality have been reported;[18-  
29  
30 20] however the short-term effect of obesity on productivity has rarely been quantified.[21] This  
31  
32 lack of comparable studies is due in part to the relatively “new” risk status of obesity as  
33  
34 compared to the long established risk status of smoking. Similar to smoking, obesity is  
35  
36 associated with increasing health care costs, productivity loss and risk of various chronic  
37  
38 diseases such as cardiovascular disease, cancer, diabetes, hypertension and osteoarthritis,[17, 22-  
39  
40 23] and even modest weight reduction can have substantial lifetime health and economic  
41  
42 benefits.[24]



1  
2  
3 The purpose of this paper is to examine the changing trends in smoking and obesity  
4 prevalence during a 30-year period (1980 to 2009) in a population of petrochemical workers, and  
5 simulate the resulting impact on productivity due to these two risk factors.  
6  
7  
8  
9

## 10 **METHODS**

11  
12  
13  
14 Permission and assurance of confidentiality are required to access the data that used in  
15 the study. Smoking and obesity prevalence data were extracted from physical examination  
16 records in the Shell Health Surveillance System (HSS), the data system used in the Company's  
17 ongoing monitoring of employee health.[25-26] The HSS comprises demographic, work history,  
18 illness absence and physical examination (i.e., health history, pre-placement, periodic  
19 examinations) data for all U.S. employees since 1978. The frequency of periodic examinations,  
20 as well as participation in the various examination programs, differed depending on the type of  
21 examination and age of the employee. For example, surveillance examinations were generally  
22 performed annually, and since they were mandated by the U.S. Occupational Safety and Health  
23 Administration, had participation rates near 100%. Pre-employment physical exams were  
24 required prior to placement in certain positions and also had nearly complete participation.  
25  
26 Voluntary examinations were offered to all employees every one to five years, depending on the  
27 age of the employee, i.e., older employees were allowed more frequent examinations.  
28  
29 Approximately 30% of employees participated in the voluntary exam program during the study  
30 period.  
31  
32  
33  
34  
35  
36  
37  
38  
39  
40  
41  
42  
43  
44  
45  
46  
47  
48

49  
50 Self-reported smoking data were collected on 65% of physical examinations along with  
51 other medical history information. Responses to smoking history questions were used to  
52 determine the smoking status of each employee (i.e., current smoker, former smoker or never-  
53 smoker). A current smoker was defined as a person who currently smoked (i.e., responded yes to  
54  
55  
56  
57  
58  
59  
60

1  
2  
3 a question about smoking cigarettes) and who had smoked 100 or more cigarettes during his/her  
4  
5 lifetime. This definition is consistent with that used by the U.S. Centers for Disease Control and  
6  
7 Prevention in the National Health Interview Survey. Height and weight were measured and  
8  
9 reported for 75% of physical examinations performed during the study period. Body mass index  
10  
11 (BMI) was calculated as  $BMI = \text{weight (kg)} / \text{height}^2 \text{ (m)}$ . Normal weight was defined as BMI  
12  
13 between 18.5 and 24.9 kg/m<sup>2</sup> and obesity as BMI of 30 kg/m<sup>2</sup> or greater.  
14  
15  
16  
17

18 Approximately 6,200 employees had BMI data in 1980-1984, 7,000 in 1985-1989, 8,000  
19  
20 in 1990-1994, 9,500 in 1995-1999, 14,000 in 2000-2004, and 6,500 in 2005-2009. Over 85% of  
21  
22 these employees also had smoking data. The substantially reduced number of examinations in  
23  
24 2005-2009 was due to a change in company policy in 2007 which limited the scope of company  
25  
26 periodic examinations. The latest examination containing smoking and BMI information during  
27  
28 each of six periods (1980-1984, 1985-1989, 1990-1994, 1995-1999, 2000-2004, 2005-2009) was  
29  
30 used in the analysis. The value for the mid-year of each of these five-year time periods, i.e.,  
31  
32 1982, 1987, 1992, 1997, 2002, 2007, represents an average for that period. The total number of  
33  
34 employees during the study period ranged from 20,000 to 28,000.  
35  
36  
37  
38  
39

40 Illness absence data is one of the major components of the HSS. While employee illness  
41  
42 absence events were consistently recorded for employees who had absences lasting five days or  
43  
44 more during the study period, they were incomplete for absences less than five days, especially  
45  
46 during the 1980s and 1990s. Therefore, the actual company absence data is not able to fully  
47  
48 describe the impact on productivity. As an alternative, and based on our review of the relevant  
49  
50 literature described earlier, we used a conservative estimate of two additional sick days per year  
51  
52 for smokers and three additional sick days per year for obese persons in the calculation of  
53  
54 productivity loss. We used the workdays lost per 100 employees as the outcome measure. We  
55  
56  
57  
58  
59  
60

1  
2  
3 also performed two sensitivity analyses to assess a range of possible values for productivity loss  
4  
5 when different assumptions were used for excess days lost due to obesity and smoking. The first  
6  
7 used two extra sick days for both smokers and obese persons, and the second used three extra  
8  
9 sick days for smokers and two extra sick days for obese persons.  
10  
11

12  
13 Directly adjusted prevalence rates for smoking and obesity by gender and work status  
14  
15 (production/staff) for the six time periods were computed with the distribution of gender and  
16  
17 work status of the last time period, i.e., 2005-2009, as the standard. This standardization was  
18  
19 necessary because of the varying proportions of male and female, and production and staff  
20  
21 employees who took physical examinations over the study period. All statistical analyses were  
22  
23 carried out using SAS System Software version 8.2.  
24  
25  
26  
27

28 This study did not involve follow-back investigations, contact with employees or next-of-  
29  
30 kin, or identification of any employee in our results. Data used in our analysis included only  
31  
32 information collected in the course of Company physical examinations. Collection and analysis  
33  
34 of HSS data is considered to be a routine Health Department activity of which employees are  
35  
36 kept informed of results. For these reasons, the study was not reviewed by an ethics committee  
37  
38 and no informed consent was requested from employees.  
39  
40  
41  
42

## 43 RESULTS

44  
45 Prevalence of cigarette smoking among Shell employees during the last 30 years has  
46  
47 gradually decreased. Approximately one-third (32.4%) of employees smoked in 1982; however  
48  
49 there was a large decline during the subsequent 15 years. Smoking prevalence decreased to  
50  
51 20.4% by 1997 and gradually leveled off to 17.0% in 2007 (Figure 1). Conversely, the  
52  
53 proportion of obese employees increased steadily during this period. In the 1980s, the  
54  
55  
56  
57  
58  
59  
60

1  
2  
3 prevalence of obesity was less than 20% (14.2% in 1982 and 19.9% in 1987). However, the rate  
4  
5 climbed considerably by the early 2000s, almost doubling to 38.9%. The prevalence of obesity  
6  
7 reached the same level as smoking, approximately 24%, around 1990. By 2007, 42% of our  
8  
9 employee population was obese.  
10

11  
12  
13 Table 1 shows the changing trends of workdays lost attributable to smoking and obesity, using an  
14  
15 average of two excess sick days for smokers and three excess days for obese persons.  
16

17  
18 Productivity loss in terms of excess absenteeism was estimated to be 43 days per 100 employees  
19  
20 for obesity and 65 days per 100 employees for smoking in 1982, with a ratio of 0.66. By 1987,  
21  
22 workdays lost due to obesity exceeded those attributable to smoking, with 60 excess workdays  
23  
24 lost per 100 employees from obesity and 50 days per 100 employees from smoking, and this  
25  
26 pattern continued through the duration of the study period. The contribution of obesity to  
27  
28 workdays lost increased dramatically beginning in the early 1990s and was 3.7-fold higher than  
29  
30 smoking by 2007, with 127 and 34 workdays lost per 100 employees due to obesity and  
31  
32 smoking, respectively. It is noteworthy that excess lost workdays from these two risk factors  
33  
34 was 50% greater in 2007 than in 1982 (Figure 2), as productivity improvements that might have  
35  
36 accrued from reduced smoking were more than offset by the steep increase in obesity prevalence.  
37  
38 During the 30-year study period, obesity accounted for two-thirds of all excess lost workdays for  
39  
40 these two risk factors.  
41  
42  
43  
44  
45  
46  
47  
48  
49  
50  
51  
52  
53  
54  
55  
56  
57  
58  
59  
60

**Table 1.** Prevalence of obesity and smoking and their impact on estimated excess workdays lost per 100 Shell Oil Company employees, 1980-2009.

|         | Mid-Year of Each Time Period*                 |      |      |      |      |      |
|---------|-----------------------------------------------|------|------|------|------|------|
|         | 1982                                          | 1987 | 1992 | 1997 | 2002 | 2007 |
|         | <i>Prevalence (%)</i>                         |      |      |      |      |      |
| Obesity | 14.2                                          | 19.9 | 27.8 | 35.4 | 38.9 | 42.4 |
| Smoking | 32.4                                          | 24.8 | 22.0 | 20.4 | 17.3 | 17.0 |
|         | <i>Excess Workdays Lost Per 100 Employees</i> |      |      |      |      |      |
| Obesity | 43                                            | 60   | 83   | 106  | 117  | 127  |
| Smoking | 65                                            | 50   | 44   | 41   | 35   | 34   |
| Ratio   | 0.66                                          | 1.20 | 1.90 | 2.60 | 3.37 | 3.74 |

\*Prevalence and excess workdays values for the mid-year of each time period (i.e., 1980-1984, 1985-1989, 1990-1994, 1995-1999, 2000-2004, 2005-2009) represent an average for that period.

1  
2  
3 We also conducted two sensitivity analyses using different assumptions for excess days  
4 lost for smokers and obese employees by varying the number of additional sick days due to these  
5 risk factors to: (1) two extra days for both obesity and smoking, and (2) two extra days for  
6 obesity and three extra days for smoking. As shown in Table 2, the patterns did not change  
7  
8 although productivity loss due to obesity did not exceed that of smoking until the 1990s.  
9  
10  
11  
12  
13  
14  
15  
16  
17  
18  
19  
20  
21  
22  
23  
24  
25  
26  
27  
28  
29  
30  
31  
32  
33  
34  
35  
36  
37  
38  
39  
40  
41  
42  
43  
44  
45  
46  
47  
48  
49  
50  
51  
52  
53  
54  
55  
56  
57  
58  
59  
60

For peer review only

**Table 2.** Range of estimated excess workdays lost due to obesity and smoking based on alternative assumptions for differential productivity loss per 100 Shell Oil Company employees, 1980-2009.

|                                                                 | Mid-Year of Each Time Period* |      |      |      |      |      |
|-----------------------------------------------------------------|-------------------------------|------|------|------|------|------|
|                                                                 | 1982                          | 1987 | 1992 | 1997 | 2002 | 2007 |
| <i>Excess Workdays Lost: Obesity (2 days), Smoking (2 days)</i> |                               |      |      |      |      |      |
| Obesity                                                         | 28                            | 40   | 56   | 71   | 78   | 85   |
| Smoking                                                         | 65                            | 50   | 44   | 41   | 35   | 34   |
| Ratio                                                           | 0.44                          | 0.80 | 1.26 | 1.74 | 2.25 | 2.50 |
| <i>Excess Workdays Lost: Obesity (2 days), Smoking (3 days)</i> |                               |      |      |      |      |      |
| Obesity                                                         | 28                            | 40   | 56   | 71   | 78   | 85   |
| Smoking                                                         | 97                            | 74   | 66   | 61   | 52   | 51   |
| Ratio                                                           | 0.29                          | 0.53 | 0.84 | 1.16 | 1.50 | 1.66 |

\*Excess workdays values for the mid-year of each time period (i.e., 1980-1984, 1985-1989, 1990-1994, 1995-1999, 2000-2004, 2005-2009) represent an average for that period.

## DISCUSSION

This is the first study examining the impact of changing trends in smoking and obesity prevalence on productivity in a population of industrial workers. In the early 1980s, workdays lost attributable to obesity was 34% lower than smoking; however by 2007 it was 3.7 times higher. The negative effect of increasing obesity rates on productivity of this workforce surpassed that of smoking as early as 1987.

At the beginning of the study, the number of lost workdays attributable to obesity was 43 per 100 employees. During the 30-year study period, workdays lost due to obesity increased to 127 per 100 employees. The economic impact of this to an employer, in terms of lost productivity, is alarming. Based on an average annual wage of \$60,000 (\$256 per day), direct costs of obesity can be estimated. At the end of 30 years, and assuming a workforce of 20,000 employees, the potential economic impact due to illness-absence from obesity would be \$6.5 million per year.

The changing patterns of obesity and smoking in this population during the study period were similar to those of the United States general population.[27] Prevalence of obesity among our employees increased from 14% in the early 1980s to 42% in 2007 while prevalence of smoking decreased from 32% to 17%. Factors attributable to the decline in smoking prevalence of this working population have been discussed in an earlier paper.[28] However, reasons for the persistently increasing prevalence of obesity are not immediately clear. It is possible that the decline of smoking has led to an increase in obesity, since smoking is associated with lower body weight and smoking cessation is associated with weight gain.[27, 29-30] One study has suggested that a reduction in smoking prevalence has been linked to an increase in obesity,[29] however, this finding was not confirmed by other researchers investigating the same issue but



1  
2  
3 with different methodology.[27] A recent study conducted by Flegal of the U.S. National Center  
4  
5 for Health Statistics found that decreasing rates of cigarette smoking probably had only a small  
6  
7 effect, less than 1%, on increasing rates of obesity in the U.S. population.[30] Therefore, it is  
8  
9 unlikely that increased rates of obesity in this workforce were due to decreasing smoking rates.  
10  
11

12  
13 One limitation of our study was the unavailability of actual company absence data to use  
14  
15 in lost productivity estimates. Although absence data were collected throughout the 30-year  
16  
17 follow-up period, variability in company absence reporting requirements resulted in only longer  
18  
19 absences (6+ days) collected in earlier years and all absences (regardless of length) collected in  
20  
21 the latter part of the study period. In addition, divestments and acquisitions of businesses and  
22  
23 sites meant that the composition of the study population changed over time. Given these  
24  
25 inconsistencies, and length of the study period, we relied upon more stable published estimates  
26  
27 of incremental days lost in our calculations.  
28  
29  
30  
31

32  
33 Estimates of lost productivity attributable to obesity and smoking are highly dependent  
34  
35 on assumptions regarding differential sick days between obese and normal weight persons and  
36  
37 between smokers and non-smokers. In the calculation of workdays lost we used three additional  
38  
39 sick days per year for obese persons and two additional days for smokers, based on existing  
40  
41 literature. These estimates seem reasonable given that compared to smoking, obesity has a much  
42  
43 larger contribution to the development of chronic conditions, and spending on health care and  
44  
45 medications.[21]  
46  
47  
48

49  
50 Another limitation of this study was our inability to assess potential confounders. Illness  
51  
52 absence in a working population is a complex phenomenon including many factors, such as diet,  
53  
54 physical activity, personal health risk factors and work-related factors.[31-33] However, the  
55  
56  
57  
58  
59  
60

1  
2  
3 strength of the study lies in the large population, followed for more than 30 years, with clinical  
4  
5 assessment of BMI and smoking status.  
6  
7

8  
9 While reducing the prevalence of obesity will clearly lead to a reduction in premature  
10 mortality and increased productivity, these will not happen immediately. In our workforce, we  
11 have initiated health programs and interventions aimed at creating a positive and supportive  
12 environment for employees attempting to increase their physical activity (i.e., exercise rooms,  
13 walking trails), and reduce weight (i.e., healthy food offerings at work). We have also  
14 redesigned company health insurance programs to promote preventive care and reward wellness  
15 activities. These programs represent the efforts of both health and benefits leaders, and are  
16 reinforced by onsite and online educational activities, and role-modeling and support by site  
17 leadership. The earlier weight management and health promotion programs are introduced, the  
18 sooner employees and employers will reap their benefits. These programs should be an urgent  
19 and joint priority of corporate health leaders and benefits managers to achieve sustainable change  
20 in employee health behaviors, and minimize the future impact of obesity on employee  
21 productivity.  
22  
23  
24  
25  
26  
27  
28  
29  
30  
31  
32  
33  
34  
35  
36  
37  
38  
39  
40  
41  
42

### 43 **What this paper adds**

- 44  
45 ➤ Obesity has steadily increased while cigarette smoking decreased over the last 30 years in  
46 this working population.  
47
- 48  
49 ➤ The productivity loss attributable to obesity, in terms of excess absenteeism, was 2/3 of  
50 that of smoking in the early 1980. However, the loss of productivity from obesity  
51 steadily increased in the next 25 years, and by the late 2000s, workdays lost from obesity  
52 was 3.7 times higher than that for smoking.  
53  
54  
55  
56  
57  
58  
59  
60

1  
2  
3  
4  
5  
6  
7  
8  
9  
10  
11  
12  
13  
14  
15  
16  
17  
18  
19  
20  
21  
22  
23  
24  
25  
26  
27  
28  
29  
30  
31  
32  
33  
34  
35  
36  
37  
38  
39  
40  
41  
42  
43  
44  
45  
46  
47  
48  
49  
50  
51  
52  
53  
54  
55  
56  
57  
58  
59  
60

- The productivity impact to employees from obesity will continue to rise without effective measures supporting employee efforts to achieve healthy weight through sustainable lifestyle changes.

For peer review only

1  
2  
3  
4  
5  
6 **Abbreviations:** HSS, Health Surveillance System; BMI, body mass index  
7  
8

9 **Funding** Internal funding.  
10

11 **Contributors:** FAB, SPT developed the aim and scope of the study. SPT and JKW carried out  
12 the statistical analysis. All authors contributed to the interpretations and to the final manuscript.  
13  
14

15 **Competing interests:** None  
16  
17

18 **Ethical approval** This study did not involve follow-back investigations, contact with employees  
19 or next-of-kin, or identification of any employee in our results. Data used in our analysis  
20 included only information collected in the course of Company physical examinations. Collection  
21 and analysis of HSS data is considered to be a routine Health Department activity of which  
22 employees are kept informed of results. For these reasons, the study was not reviewed by an  
23 ethics committee and no informed consent was requested from employees.  
24  
25  
26  
27  
28  
29  
30  
31  
32  
33  
34

35 **Data sharing:** No additional data are available.  
36  
37  
38  
39  
40  
41  
42  
43  
44  
45  
46  
47  
48  
49  
50  
51  
52  
53  
54  
55  
56  
57  
58  
59  
60

## REFERENCES

1. Finkelstein EA, DiBonaventura MD, Burgess SM, et al. The costs of obesity in the workplace. *J Occup Environ Med* 2010; **52**:971-976.
2. Centers for Disease Control and Prevention. Smoking and Tobacco Use: History of the Surgeon General's Report on Smoking and Health.  
[http://www.cdc.gov/tobacco/data\\_statistics/sgr/history/index.htm](http://www.cdc.gov/tobacco/data_statistics/sgr/history/index.htm). Date accessed: 12/11/2013.
3. Mendez D, Warner K. Adult cigarette smoking prevalence: declining as expected (not as desired). *Am J Public Health* 2004;**94**:251-252.
4. Centers for Disease Control and Prevention. Cigarette smoking among adults – United States, 2000. *MMWR* 2002;**51**:642-645.
5. Centers for Disease Control and Prevention. Cigarette smoking among adults and trends in smoking cessation – United States, 2008. *MMWR* 2009;**58**:1227-1232.
6. Cokkinides V, Bandi P, McMahon C, et al. Tobacco control in the United States – recent progress and opportunities. *Ca Cancer J Clin* 2009;**59**:352-365.
7. Flegal KM, Carroll MD, Ogden CL, et al. Prevalence and trends in obesity among US adults, 1999-2000. *JAMA* 2002;**288**:1723-1727.
8. Flegal KM, Carroll MD, Ogden CL, et al. Prevalence and trends in obesity among US adults, 1999-2008. *JAMA* 2010;**303**:235-241.
9. Wang WQ, Dobson AJ. Cigarette smoking and sick leave in an industrial population in Shanghai, China. *Int J Epidemiol* 1992;**21**:293-297.

- 1  
2  
3  
4  
5  
6  
7  
8  
9  
10  
11  
12  
13  
14  
15  
16  
17  
18  
19  
20  
21  
22  
23  
24  
25  
26  
27  
28  
29  
30  
31  
32  
33  
34  
35  
36  
37  
38  
39  
40  
41  
42  
43  
44  
45  
46  
47  
48  
49  
50  
51  
52  
53  
54  
55  
56  
57  
58  
59  
60
10. Tsai SP, Gilstrap EL, Colangelo TA, et al. Illness absence at an oil refinery and petrochemical plant. *J Occup Environ Med* 1997;**39**:455-462.
11. Bertera RL. The effect of behavioral risks and health-care cost in the workplace. *J Occup Med* 1991;**33**:1119-1124.
12. Kelloway EK, Barling J, Weber C. Smoking and absence from work- a Quantitative review. In M. Koslowsky and M. Krausz (eds.) *Voluntary Employee Withdrawal and Inattendance*. New York: Kluwer Academic/Plenum 2002;167-178.
13. Tsai SP, Wendt JK, Ahmed FS, et al. Illness absence patterns among employees in a petrochemical facility: impact of selected health risk factors. *J Occup Environ Med* 2005;**47**:838-846.
14. Tsai SP, Ahmed FS, Wendt JK, et al. The impact of obesity on illness absence and productivity in an industrial population of petrochemical workers. *Ann Epidemiol* 2008;**18**:8-14.
15. Harvey SB, Glozier N, Carlton O, et al. Obesity and sickness absence: results from the CHAP study. *Occup Med (Lond)* 2010;**60**:362-8.
16. Jans MP, van den Heuvel SG, Hildebrandt VH, et al. Overweight and obesity as predictors of absenteeism in the working population of the Netherlands. *J Occup Environ Med* 2007;**49**:975-980.
17. Neovius K, Johansson K, Kark M, et al. Obesity status and sick leave: a systematic review. *Obesity Review* 2009;**10**:17-27.
18. Stewart ST, Cutler DM, Rosen AB. Forecasting the effects of obesity and smoking on U.S. life expectancy. *N Engl J Med* 2009;**361**:2252-2260.

19. Mokdad AH, Marks JS, Stroup DF, et al. Actual causes of death in the United States, 2000. *JAMA* 2004;**291**:1238-1245.
20. Flegal KM, Grubard BI, Williamson DF, et al. Excess deaths associated with underweight, overweight, and obesity. *JAMA* 2005;**293**:1861-1867.
21. Sturm R. The effects of obesity, smoking, and drinking on medical problems and costs. *Health Affairs* 2002;**21**:245-253.
22. World Health Organization (WHO). Obesity: Preventing and Managing the Global Epidemic. Report of a WHO Consultation. World Health Organization: Geneva, 2004.
23. Thompson D, Edelsberg J, Kinsey KL, et al. Estimated economic costs of obesity to U.S. business. *Am J Health Promt.* 1998;**13**:120-127.
24. Orzano AJ, Scott JG. Diagnosis and treatment of obesity in adults: an applied evidence-based review. *J Am Board Fam Pract* 2004;**17**:359-369.
25. Joyner RE, Pack PH. The Shell Oil Company's computerized health surveillance system. *J Occup Med* 1982;**24**:812-814.
26. Tsai SP, Dowd CM, Cowles SR, et al. Prospective morbidity surveillance of Shell refinery and petrochemical employees. *Br J Ind Med* 1991;**48**:155-163.
27. Gruber J, Frakes M. Does falling smoking lead to rising obesity? *J Health Economic* 2006;**25**:183-197.
28. Tsai SP, Wendt JK, Hunter RB. Trends in cigarette smoking among refinery and petrochemical plant employees with a discussion of the potential impact on lung cancer. *Int Arch Occup Environ Health* 2001;**74**:477-482.

- 1  
2  
3  
4  
5  
6  
7  
8  
9  
10  
11  
12  
13  
14  
15  
16  
17  
18  
19  
20  
21  
22  
23  
24  
25  
26  
27  
28  
29  
30  
31  
32  
33
29. Chou SY, Grossman M, Saffer H. An economic analysis of adult obesity: results from the behavioral risk factor surveillance system. *J Health Economic* 2004;**23**:565-587.
30. Flegal KM. The effect of changes in smoking prevalence on obesity prevalence in the United States. *Am J Public Health* 2007;**97**:1510-1514.
31. Alavanja SM, van der Berg TIJ, van Duivenbooden C, et al. Impact of work-related factors, lifestyle, and work ability on sickness absence among Dutch construction workers. *Scand J Work Environ Health* 2009;**35**:325-333.
32. Laaksonen M, Piha K, Martikainen P, et al. Health-related behaviours and sickness absence from work. *Occup Environ Med* 2009;**66**:840-847.
33. Labriola M, Lund T, Burr H. Prospective study of physical and psychosocial risk factors for sickness absence. *Occup Med* 2006;**56**:469-474.

34  
35  
36  
37

Figure 1. Changing trends in prevalence of smoking and obesity in the Shell workforce, 1980-2009.

38  
39  
40  
41  
42  
43  
44  
45  
46  
47  
48  
49  
50  
51  
52  
53  
54  
55  
56  
57  
58  
59  
60

Figure 2. Excess workdays lost per 100 Shell employees due to obesity and smoking, 1980-2009.



1  
2  
3 Simulating the impact of changing trends in smoking and obesity on productivity of an industrial  
4  
5 population  
6  
7  
8  
9  
10

11 Faiyaz A. Bhojani, MD, DrPH

12  
13 Shan P. Tsai, PhD\*

14  
15  
16  
17 Judy K. Wendt, PhD

18  
19  
20 Kim L. Koller, MD

21  
22  
23  
24  
25  
26 Shell Oil Company, Houston, Texas, USA

27  
28 Shell Health

29  
30  
31 One Shell Plaza

32  
33  
34 P.O. Box 2463

35  
36  
37 Telephone (713) 241-6078

38  
39  
40 Fax (713) 241-5875

41  
42  
43 \*corresponding author

44  
45  
46  
47  
48 **Running Title:** Obesity and Smoking on Productivity

49  
50  
51 **Keywords:** obesity, smoking, productivity

## ABSTRACT

**Objective:** To estimate the impact of trends in smoking and obesity prevalence on productivity loss among petrochemical employees from 1980 to 2009.

**Methods:** Smoking and obesity information were collected during company physical examinations. Productivity loss was calculated as differential workdays lost between smokers and non-smokers, and obese and normal weight employees.

**Results:** During 1980-2009, smoking prevalence decreased from 32% to 17%, while obesity prevalence increased from 14% to 42%. In 1982, lost productivity from obesity was an estimated 43 days per 100 employees, and for smoking, 65 days per 100 employees, but by 1987, workdays lost due to obesity exceeded that attributable to smoking. In 2007, workdays lost from obesity was 3.7 times higher than for smoking.

**Conclusion:** Because of the increasing trend in obesity, the productivity impact to employers from obesity will continue to rise without effective measures supporting employee efforts to achieve healthy weight through sustainable lifestyle changes.

### Strengths and limitations of this study

- Large study population and followed for more than 30 years
- Clinical assessment of BMI and smoking status, i.e., data were collected during physical examination
- Prevalence rates for smoking and obesity were adjusted by gender and work status
- Unavailability of actual company absence data to use in lost productivity estimates

## INTRODUCTION

Smoking and obesity are two major health risk factors facing many populations today. The impact of these factors in the workplace is an issue beyond personal health. Obesity is a major contributor to productivity loss for U.S. business; an estimated \$43 billion per year.[1] The health hazards of smoking have received the most public attention among major lifestyle risks in the last 40 years due in part to the publicity of the annual U.S. Surgeon General's reports on smoking from the 1960s.[2] As a result, smoking prevalence among American adults over the last 40 years has steadily declined from 37.4% in 1970,[3] to 22.5% in 2002[4] and to 20.6% in 2008.[5] Factors contributing to the decrease include smoking bans, media campaigns against smoking, higher cigarette taxes and insurance coverage for smoking cessation programs.[2, 6] On the other hand, there has been a large rise in obesity prevalence over the same period. The prevalence of obesity for Americans over the age of 20 years has increased from 14.6% in 1971-1974,[7] to 30% in 2002[7] and to 34% in 2008.[8]

Productivity loss attributable to smoking and obesity is important to industry. Several studies have reported that smoking employees have substantially greater absenteeism than non-smoking employees. Based on a survey of cigarette smoking and sick leave at a large petrochemical complex in China, Wang and Dobson reported that on average, smokers missed three additional workdays due to illness each year than non-smokers.[9] Tsai and colleagues examined employees at several Shell Oil Company facilities and estimated an excess sick leave of approximately three days among smokers.[10] Other studies have reported that smokers miss more workdays than non-smokers, ranging from 0.9 to 13.5 days, with an average excess of 2.1 sick days.[11-13]

1  
2  
3 A relatively small number of studies have attempted to examine the relationship between  
4 obesity and duration of illness absence. Based on a 10-year follow-up study in the United States,  
5 obese employees of a petrochemical company missed an average of 3.7 extra workdays per year  
6 compared to normal weight persons.[14] A study conducted on employees from London  
7  
8 Underground Ltd reported that obese persons typically took an extra four days of sick leave  
9  
10 every year compared to normal weight persons,[15] and a prospective study of a Dutch working  
11  
12 population reported that obese employees were absent 14 days more per year than normal-weight  
13  
14 employees.[16] In a recent systematic review, Neovius and colleagues reported that obese  
15  
16 American workers had approximately one to three additional illness absence days per year, and  
17  
18 obese European workers had about 10 additional days compared with their respective normal  
19  
20 weight counterparts.[17]

21  
22 While numerous studies have been conducted on various health and economic impacts of  
23  
24 smoking trends,[2] studies on the impact of increasing obesity prevalence over time, particularly  
25  
26 related to illness absence in working populations, have been limited. In recent years,  
27  
28 comparisons of the long-term effect of obesity and smoking on mortality have been reported;[18-  
29  
30 20] however the short-term effect of obesity on productivity has rarely been quantified.[21] This  
31  
32 lack of comparable studies is due in part to the relatively “new” risk status of obesity as  
33  
34 compared to the long established risk status of smoking. Similar to smoking, obesity is  
35  
36 associated with increasing health care costs, productivity loss and risk of various chronic  
37  
38 diseases such as cardiovascular disease, cancer, diabetes, hypertension and osteoarthritis,[17, 22-  
39  
40 23] and even modest weight reduction can have substantial lifetime health and economic  
41  
42 benefits.[24]

1  
2  
3 The purpose of this paper is to examine the changing trends in smoking and obesity  
4 prevalence during a 30-year period (1980 to 2009) in a population of petrochemical workers, and  
5  
6 simulate the resulting impact on productivity due to these two risk factors.  
7  
8  
9

## 10 11 **METHODS**

12  
13  
14 Smoking and obesity prevalence data were extracted from physical examination records  
15 in the Shell Health Surveillance System (HSS), the data system used in the Company's ongoing  
16 monitoring of employee health.[25-26] The HSS comprises demographic, work history, illness  
17 absence and physical examination (i.e., health history, pre-placement, periodic examinations)  
18 data for all U.S. employees since 1978. The frequency of periodic examinations, as well as  
19 participation in the various examination programs, differed depending on the type of  
20 examination and age of the employee. For example, surveillance examinations were generally  
21 performed annually, and since they were mandated by the U.S. Occupational Safety and Health  
22 Administration, had participation rates near 100%. Pre-employment physical exams were  
23 required prior to placement in certain positions and also had nearly complete participation.  
24 Voluntary examinations were offered to all employees every one to five years, depending on the  
25 age of the employee, i.e., older employees were allowed more frequent examinations.  
26 Approximately 30% of employees participated in the voluntary exam program during the study  
27 period.  
28  
29  
30  
31  
32  
33  
34  
35  
36  
37  
38  
39  
40  
41  
42  
43  
44  
45  
46

47 Self-reported smoking data were collected on 65% of physical examinations along with  
48 other medical history information. Responses to smoking history questions were used to  
49 determine the smoking status of each employee (i.e., current smoker, former smoker or never-  
50 smoker). A current smoker was defined as a person who currently smoked (i.e., responded yes to  
51 a question about smoking cigarettes) and who had smoked 100 or more cigarettes during his/her  
52  
53  
54  
55  
56  
57  
58  
59  
60

1  
2  
3 lifetime. This definition is consistent with that used by the U.S. Centers for Disease Control and  
4  
5 Prevention in the National Health Interview Survey. Height and weight were measured and  
6  
7 reported for 75% of physical examinations performed during the study period. Body mass index  
8  
9 (BMI) was calculated as  $BMI = \text{weight (kg)} / \text{height}^2 \text{ (m)}$ . Normal weight was defined as BMI  
10  
11 between 18.5 and 24.9 kg/m<sup>2</sup> and obesity as BMI of 30 kg/m<sup>2</sup> or greater.  
12  
13

14  
15 Approximately 6,200 employees had BMI data in 1980-1984, 7,000 in 1985-1989, 8,000  
16  
17 in 1990-1994, 9,500 in 1995-1999, 14,000 in 2000-2004, and 6,500 in 2005-2009. Over 85% of  
18  
19 these employees also had smoking data. The substantially reduced number of examinations in  
20  
21 2005-2009 was due to a change in company policy in 2007 which limited the scope of company  
22  
23 periodic examinations. The latest examination containing smoking and BMI information during  
24  
25 each of six periods (1980-1984, 1985-1989, 1990-1994, 1995-1999, 2000-2004, 2005-2009) was  
26  
27 used in the analysis. The value for the mid-year of each of these five-year time periods, i.e.,  
28  
29 1982, 1987, 1992, 1997, 2002, 2007, represents an average for that period. The total number of  
30  
31 employees during the study period ranged from 20,000 to 28,000.  
32  
33  
34  
35  
36

37  
38 Illness absence data is one of the major components of the HSS. While employee illness  
39  
40 absence events were consistently recorded for employees who had absences lasting five days or  
41  
42 more during the study period, they were incomplete for absences less than five days, especially  
43  
44 during the 1980s and 1990s. Therefore, the actual company absence data is not able to fully  
45  
46 describe the impact on productivity. As an alternative, and based on our review of the relevant  
47  
48 literature described earlier, we used a conservative estimate of two additional sick days per year  
49  
50 for smokers and three additional sick days per year for obese persons in the calculation of  
51  
52 productivity loss. [We used the workdays lost per 100 employees as the outcome measure.](#) We  
53  
54 also performed two sensitivity analyses to assess a range of possible values for productivity loss  
55  
56  
57  
58  
59  
60

1  
2  
3 when different assumptions were used for excess days lost due to obesity and smoking. The first  
4  
5 used two extra sick days for both smokers and obese persons, and the second used three extra  
6  
7 sick days for smokers and two extra sick days for obese persons.  
8  
9

10  
11 Directly adjusted prevalence rates for smoking and obesity by gender and work status  
12  
13 (production/staff) for the six time periods were computed with the distribution of gender and  
14  
15 work status of the last time period, i.e., 2005-2009, as the standard. This standardization was  
16  
17 necessary because of the varying proportions of male and female, and production and staff  
18  
19 employees who took physical examinations over the study period. All statistical analyses were  
20  
21 carried out using SAS System Software version 8.2.  
22  
23

24  
25  
26 This study did not involve follow-back investigations, contact with employees or next-of-  
27  
28 kin, or identification of any employee in our results. Data used in our analysis included only  
29  
30 information collected in the course of Company physical examinations. Collection and analysis  
31  
32 of HSS data is considered to be a routine Health Department activity of which employees are  
33  
34 kept informed of results. For these reasons, the study was not reviewed by an ethics committee  
35  
36 and no informed consent was requested from employees.  
37  
38

## 39 40 41 **RESULTS**

42  
43 Prevalence of cigarette smoking among Shell employees during the last 30 years has  
44  
45 gradually decreased. Approximately one-third (32.4%) of employees smoked in 1982; however  
46  
47 there was a large decline during the subsequent 15 years. Smoking prevalence decreased to  
48  
49 20.4% by 1997 and gradually leveled off to 17.0% in 2007 (Figure 1). Conversely, the  
50  
51 proportion of obese employees increased steadily during this period. In the 1980s, the  
52  
53 prevalence of obesity was less than 20% (14.2% in 1982 and 19.9% in 1987). However, the rate  
54  
55  
56  
57  
58  
59  
60

1  
2  
3 climbed considerably by the early 2000s, almost doubling to 38.9%. The prevalence of obesity  
4 reached the same level as smoking, approximately 24%, around 1990. By 2007, 42% of our  
5 employee population was obese.  
6  
7  
8  
9

10  
11 Table 1 shows the changing trends of workdays lost attributable to smoking and obesity, using an  
12 average of two excess sick days for smokers and three excess days for obese persons.  
13

14  
15 Productivity loss in terms of excess absenteeism was estimated to be 43 days per 100 employees  
16 for obesity and 65 days per 100 employees for smoking in 1982, with a ratio of 0.66. By 1987,  
17 workdays lost due to obesity exceeded those attributable to smoking, with 60 excess workdays  
18 lost per 100 employees from obesity and 50 days per 100 employees from smoking, and this  
19 pattern continued through the duration of the study period. The contribution of obesity to  
20 workdays lost increased dramatically beginning in the early 1990s and was 3.7-fold higher than  
21 smoking by 2007, with 127 and 34 workdays lost per 100 employees due to obesity and  
22 smoking, respectively. It is noteworthy that excess lost workdays from these two risk factors  
23 was 50% greater in 2007 than in 1982 (Figure 2), as productivity improvements that might have  
24 accrued from reduced smoking were more than offset by the steep increase in obesity prevalence.  
25 During the 30-year study period, obesity accounted for two-thirds of all excess lost workdays for  
26 these two risk factors.  
27  
28  
29  
30  
31  
32  
33  
34  
35  
36  
37  
38  
39  
40  
41  
42  
43  
44  
45  
46  
47  
48  
49  
50  
51  
52  
53  
54  
55  
56  
57  
58  
59  
60



**Table 1.** Prevalence of obesity and smoking and their impact on estimated **excess workdays lost per 100 Shell Oil Company employees**, 1980-2009.

|         | Mid-Year of Each Time Period*                 |      |      |      |      |      |
|---------|-----------------------------------------------|------|------|------|------|------|
|         | 1982                                          | 1987 | 1992 | 1997 | 2002 | 2007 |
|         | <i>Prevalence (%)</i>                         |      |      |      |      |      |
| Obesity | 14.2                                          | 19.9 | 27.8 | 35.4 | 38.9 | 42.4 |
| Smoking | 32.4                                          | 24.8 | 22.0 | 20.4 | 17.3 | 17.0 |
|         | <i>Excess Workdays Lost Per 100 Employees</i> |      |      |      |      |      |
| Obesity | 43                                            | 60   | 83   | 106  | 117  | 127  |
| Smoking | 65                                            | 50   | 44   | 41   | 35   | 34   |
| Ratio   | 0.66                                          | 1.20 | 1.90 | 2.60 | 3.37 | 3.74 |

\*Prevalence and excess workdays values for the mid-year of each time period (i.e., 1980-1984, 1985-1989, 1990-1994, 1995-1999, 2000-2004, 2005-2009) represent an average for that period.

1  
2  
3 We also conducted two sensitivity analyses using different assumptions for excess days  
4 lost for smokers and obese employees by varying the number of additional sick days due to these  
5 risk factors to: (1) two extra days for both obesity and smoking, and (2) two extra days for  
6 obesity and three extra days for smoking. As shown in Table 2, the patterns did not change  
7 although productivity loss due to obesity did not exceed that of smoking until the 1990s.  
8  
9  
10  
11  
12  
13  
14  
15  
16  
17  
18  
19  
20  
21  
22  
23  
24  
25  
26  
27  
28  
29  
30  
31  
32  
33  
34  
35  
36  
37  
38  
39  
40  
41  
42  
43  
44  
45  
46  
47  
48  
49  
50  
51  
52  
53  
54  
55  
56  
57  
58  
59  
60

For peer review only

**Table 2.** Range of estimated excess workdays lost due to obesity and smoking based on alternative assumptions for differential productivity loss per 100 Shell Oil Company employees, 1980-2009.

|                                                                 | Mid-Year of Each Time Period* |      |      |      |      |      |
|-----------------------------------------------------------------|-------------------------------|------|------|------|------|------|
|                                                                 | 1982                          | 1987 | 1992 | 1997 | 2002 | 2007 |
| <i>Excess Workdays Lost: Obesity (2 days), Smoking (2 days)</i> |                               |      |      |      |      |      |
| Obesity                                                         | 28                            | 40   | 56   | 71   | 78   | 85   |
| Smoking                                                         | 65                            | 50   | 44   | 41   | 35   | 34   |
| Ratio                                                           | 0.44                          | 0.80 | 1.26 | 1.74 | 2.25 | 2.50 |
| <i>Excess Workdays Lost: Obesity (2 days), Smoking (3 days)</i> |                               |      |      |      |      |      |
| Obesity                                                         | 28                            | 40   | 56   | 71   | 78   | 85   |
| Smoking                                                         | 97                            | 74   | 66   | 61   | 52   | 51   |
| Ratio                                                           | 0.29                          | 0.53 | 0.84 | 1.16 | 1.50 | 1.66 |

\*Excess workdays values for the mid-year of each time period (i.e., 1980-1984, 1985-1989, 1990-1994, 1995-1999, 2000-2004, 2005-2009) represent an average for that period.

## DISCUSSION

This is the first study examining the impact of changing trends in smoking and obesity prevalence on productivity in a population of industrial workers. In the early 1980s, workdays lost attributable to obesity was 34% lower than smoking; however by 2007 it was 3.7 times higher. The negative effect of increasing obesity rates on productivity of this workforce surpassed that of smoking as early as 1987.

At the beginning of the study, the number of lost workdays attributable to obesity was 43 per 100 employees. During the 30-year study period, workdays lost due to obesity increased to 127 per 100 employees. The economic impact of this to an employer, in terms of lost productivity, is alarming. Based on an average annual wage of \$60,000 (\$256 per day), direct costs of obesity can be estimated. At the end of 30 years, and assuming a workforce of 20,000 employees, the potential economic impact due to illness-absence from obesity would be \$6.5 million per year.

The changing patterns of obesity and smoking in this population during the study period were similar to those of the United States general population.[27] Prevalence of obesity among our employees increased from 14% in the early 1980s to 42% in 2007 while prevalence of smoking decreased from 32% to 17%. Factors attributable to the decline in smoking prevalence of this working population have been discussed in an earlier paper.[28] However, reasons for the persistently increasing prevalence of obesity are not immediately clear. It is possible that the decline of smoking has led to an increase in obesity, since smoking is associated with lower body weight and smoking cessation is associated with weight gain.[27, 29-30] One study has suggested that a reduction in smoking prevalence has been linked to an increase in obesity,[29] however, this finding was not confirmed by other researchers investigating the same issue but

1  
2  
3 with different methodology.[27] A recent study conducted by Flegal of the U.S. National Center  
4  
5 for Health Statistics found that decreasing rates of cigarette smoking probably had only a small  
6  
7 effect, less than 1%, on increasing rates of obesity in the U.S. population.[30] Therefore, it is  
8  
9 unlikely that increased rates of obesity in this workforce were due to decreasing smoking rates.  
10  
11

12  
13 One limitation of our study was the unavailability of actual company absence data to use  
14  
15 in lost productivity estimates. Although absence data were collected throughout the 30-year  
16  
17 follow-up period, variability in company absence reporting requirements resulted in only longer  
18  
19 absences (6+ days) collected in earlier years and all absences (regardless of length) collected in  
20  
21 the latter part of the study period. In addition, divestments and acquisitions of businesses and  
22  
23 sites meant that the composition of the study population changed over time. Given these  
24  
25 inconsistencies, and length of the study period, we relied upon more stable published estimates  
26  
27 of incremental days lost in our calculations.  
28  
29  
30  
31

32  
33 Estimates of lost productivity attributable to obesity and smoking are highly dependent  
34  
35 on assumptions regarding differential sick days between obese and normal weight persons and  
36  
37 between smokers and non-smokers. In the calculation of workdays lost we used three additional  
38  
39 sick days per year for obese persons and two additional days for smokers, based on existing  
40  
41 literature. These estimates seem reasonable given that compared to smoking, obesity has a much  
42  
43 larger contribution to the development of chronic conditions, and spending on health care and  
44  
45 medications.[21]  
46  
47  
48

49  
50 Another limitation of this study was our inability to assess potential confounders. Illness  
51  
52 absence in a working population is a complex phenomenon including many factors, such as diet,  
53  
54 physical activity, personal health risk factors and work-related factors.[31-33] However, the  
55  
56  
57  
58  
59  
60

1  
2  
3 strength of the study lies in the large population, followed for more than 30 years, with clinical  
4  
5 assessment of BMI and smoking status.  
6  
7

8  
9 While reducing the prevalence of obesity will clearly lead to a reduction in premature  
10 mortality and increased productivity, these will not happen immediately. In our workforce, we  
11 have initiated health programs and interventions aimed at creating a positive and supportive  
12 environment for employees attempting to increase their physical activity (i.e., exercise rooms,  
13 walking trails), and reduce weight (i.e., healthy food offerings at work). We have also  
14 redesigned company health insurance programs to promote preventive care and reward wellness  
15 activities. These programs represent the efforts of both health and benefits leaders, and are  
16 reinforced by onsite and online educational activities, and role-modeling and support by site  
17 leadership. The earlier weight management and health promotion programs are introduced, the  
18 sooner employees and employers will reap their benefits. These programs should be an urgent  
19 and joint priority of corporate health leaders and benefits managers to achieve sustainable change  
20 in employee health behaviors, and minimize the future impact of obesity on employee  
21 productivity.  
22  
23  
24  
25  
26  
27  
28  
29  
30  
31  
32  
33  
34  
35  
36  
37  
38  
39  
40  
41  
42

### 43 **What this paper adds**

- 44  
45 ➤ Obesity has steadily increased while cigarette smoking decreased over the last 30 years in  
46 this working population.  
47
- 48  
49 ➤ The productivity loss attributable to obesity, in terms of excess absenteeism, was 2/3 of  
50 that of smoking in the early 1980. However, the loss of productivity from obesity  
51 steadily increased in the next 25 years, and by the late 2000s, workdays lost from obesity  
52 was 3.7 times higher than that for smoking.  
53  
54  
55  
56  
57  
58  
59  
60

- 1  
2  
3  
4  
5  
6  
7  
8  
9  
10  
11  
12  
13  
14  
15  
16  
17  
18  
19  
20  
21  
22  
23  
24  
25  
26  
27  
28  
29  
30  
31  
32  
33  
34  
35  
36  
37  
38  
39  
40  
41  
42  
43  
44  
45  
46  
47  
48  
49  
50  
51  
52  
53  
54  
55  
56  
57  
58  
59  
60
- The productivity impact to employees from obesity will continue to rise without effective measures supporting employee efforts to achieve healthy weight through sustainable lifestyle changes.

**Abbreviations:** HSS, Health Surveillance System; BMI, body mass index

**Contributors:** FAB, SPT developed the aim and scope of the study. SPT and JKW carried out the statistical analysis. All authors contributed to the interpretations and to the final manuscript.

**Funding** Internal funding.

**Competing interests** The authors declare they have no actual or potential competing financial interests.

**Ethical approval** This study did not involve follow-back investigations, contact with employees or next-of-kin, or identification of any employee in our results. Data used in our analysis included only information collected in the course of Company physical examinations. Collection and analysis of HSS data is considered to be a routine Health Department activity of which employees are kept informed of results. For these reasons, the study was not reviewed by an ethics committee and no informed consent was requested from employees.

**Data sharing:** No additional data are available.

**Competing Interests:** None

## REFERENCES

1. Finkelstein EA, DiBonaventura MD, Burgess SM, et al. The costs of obesity in the workplace. *J Occup Environ Med* 2010; **52**:971-976.
2. Centers for Disease Control and Prevention. Smoking and Tobacco Use: History of the Surgeon General's Report on Smoking and Health.  
[http://www.cdc.gov/tobacco/data\\_statistics/sgr/history/index.htm](http://www.cdc.gov/tobacco/data_statistics/sgr/history/index.htm). Date accessed: 12/11/2013.
3. Mendez D, Warner K. Adult cigarette smoking prevalence: declining as expected (not as desired). *Am J Public Health* 2004;**94**:251-252.
4. Centers for Disease Control and Prevention. Cigarette smoking among adults – United States, 2000. *MMWR* 2002;**51**:642-645.
5. Centers for Disease Control and Prevention. Cigarette smoking among adults and trends in smoking cessation – United States, 2008. *MMWR* 2009;**58**:1227-1232.
6. Cokkinides V, Bandi P, McMahon C, et al. Tobacco control in the United States – recent progress and opportunities. *Ca Cancer J Clin* 2009;**59**:352-365.
7. Flegal KM, Carroll MD, Ogden CL, et al. Prevalence and trends in obesity among US adults, 1999-2000. *JAMA* 2002;**288**:1723-1727.
8. Flegal KM, Carroll MD, Ogden CL, et al. Prevalence and trends in obesity among US adults, 1999-2008. *JAMA* 2010;**303**:235-241.
9. Wang WQ, Dobson AJ. Cigarette smoking and sick leave in an industrial population in Shanghai, China. *Int J Epidemiol* 1992;**21**:293-297.



- 1  
2  
3 10. Tsai SP, Gilstrap EL, Colangelo TA, et al. Illness absence at an oil refinery and  
4  
5 petrochemical plant. *J Occup Environ Med* 1997;**39**:455-462.  
6  
7
- 8  
9 11. Bertera RL. The effect of behavioral risks and health-care cost in the workplace. *J Occup*  
10  
11 *Med* 1991;**33**:1119-1124.  
12  
13
- 14 12. Kelloway EK, Barling J, Weber C. Smoking and absence from work- a Quantitative  
15  
16 review. In M. Koslowsky and M. Krausz (eds.) *Voluntary Employee Withdrawal and*  
17  
18 *Inattendance*. New York: Kluwer Academic/Plenum 2002;167-178.  
19  
20
- 21 13. Tsai SP, Wendt JK, Ahmed FS, et al. Illness absence patterns among employees in a  
22  
23 petrochemical facility: impact of selected health risk factors. *J Occup Environ Med*  
24  
25 2005;**47**:838-846.  
26  
27
- 28  
29 14. Tsai SP, Ahmed FS, Wendt JK, et al. The impact of obesity on illness absence and  
30  
31 productivity in an industrial population of petrochemical workers. *Ann Epidemiol*  
32  
33 2008;**18**:8-14.  
34  
35
- 36  
37 15. Harvey SB, Glozier N, Carlton O, et al. Obesity and sickness absence: results from the  
38  
39 CHAP study. *Occup Med (Lond)* 2010;**60**:362-8.  
40  
41
- 42 16. Jans MP, van den Heuvel SG, Hildebrandt VH, et al. Overweight and obesity as predictors  
43  
44 of absenteeism in the working population of the Netherlands. *J Occup Environ Med*  
45  
46 2007;**49**:975-980.  
47  
48
- 49  
50 17. Neovius K, Johansson K, Kark M, et al. Obesity status and sick leave: a systematic  
51  
52 review. *Obesity Review* 2009;**10**:17-27.  
53  
54
- 55 18. Stewart ST, Cutler DM, Rosen AB. Forecasting the effects of obesity and smoking on  
56  
57 U.S. life expectancy. *N Engl J Med* 2009;**361**:2252-2260.  
58  
59  
60

19. Mokdad AH, Marks JS, Stroup DF, et al. Actual causes of death in the United States, 2000. *JAMA* 2004;**291**:1238-1245.
20. Flegal KM, Grubard BI, Williamson DF, et al. Excess deaths associated with underweight, overweight, and obesity. *JAMA* 2005;**293**:1861-1867.
21. Sturm R. The effects of obesity, smoking, and drinking on medical problems and costs. *Health Affairs* 2002;**21**:245-253.
22. World Health Organization (WHO). Obesity: Preventing and Managing the Global Epidemic. Report of a WHO Consultation. World Health Organization: Geneva, 2004.
23. Thompson D, Edelsberg J, Kinsey KL, et al. Estimated economic costs of obesity to U.S. business. *Am J Health Promt.* 1998;**13**:120-127.
24. Orzano AJ, Scott JG. Diagnosis and treatment of obesity in adults: an applied evidence-based review. *J Am Board Fam Pract* 2004;**17**:359-369.
25. Joyner RE, Pack PH. The Shell Oil Company's computerized health surveillance system. *J Occup Med* 1982;**24**:812-814.
26. Tsai SP, Dowd CM, Cowles SR, et al. Prospective morbidity surveillance of Shell refinery and petrochemical employees. *Br J Ind Med* 1991;**48**:155-163.
27. Gruber J, Frakes M. Does falling smoking lead to rising obesity? *J Health Economic* 2006;**25**:183-197.
28. Tsai SP, Wendt JK, Hunter RB. Trends in cigarette smoking among refinery and petrochemical plant employees with a discussion of the potential impact on lung cancer. *Int Arch Occup Environ Health* 2001;**74**:477-482.

- 1  
2  
3  
4  
5  
6  
7  
8  
9  
10  
11  
12  
13  
14  
15  
16  
17  
18  
19  
20  
21  
22  
23  
24  
25  
26  
27  
28  
29  
30  
31  
32  
33  
34  
35  
36  
37  
38  
39  
40  
41  
42  
43  
44  
45  
46  
47  
48  
49  
50  
51  
52  
53  
54  
55  
56  
57  
58  
59  
60
29. Chou SY, Grossman M, Saffer H. An economic analysis of adult obesity: results from the behavioral risk factor surveillance system. *J Health Economic* 2004;**23**:565-587.
30. Flegal KM. The effect of changes in smoking prevalence on obesity prevalence in the United States. *Am J Public Health* 2007;**97**:1510-1514.
31. Alavanja SM, van der Berg TIJ, van Duivenbooden C, et al. Impact of work-related factors, lifestyle, and work ability on sickness absence among Dutch construction workers. *Scand J Work Environ Health* 2009;**35**:325-333.
32. Laaksonen M, Piha K, Martikainen P, et al. Health-related behaviours and sickness absence from work. *Occup Environ Med* 2009;**66**:840-847.
33. Labriola M, Lund T, Burr H. Prospective study of physical and psychosocial risk factors for sickness absence. *Occup Med* 2006;**56**:469-474.

1  
2  
3  
4  
5  
6  
7  
8  
9  
10  
11  
12  
13  
14  
15  
16  
17  
18  
19  
20  
21  
22  
23  
24  
25  
26  
27  
28  
29  
30  
31  
32  
33  
34  
35  
36  
37  
38  
39  
40  
41  
42  
43  
44  
45  
46  
47  
48  
49  
50  
51  
52  
53  
54  
55  
56  
57  
58  
59  
60

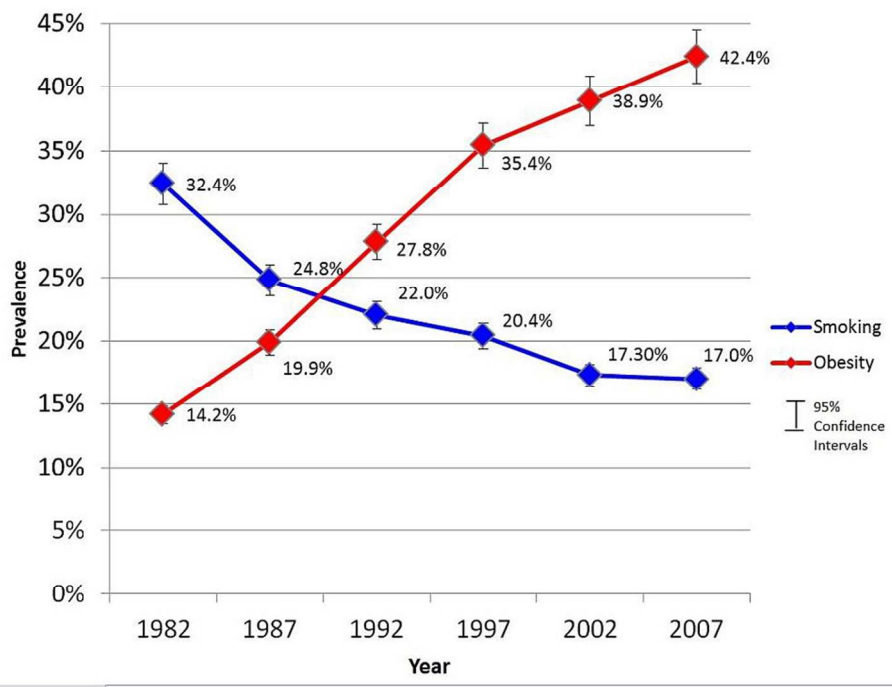

90x62mm (300 x 300 DPI)

view only

1  
2  
3  
4  
5  
6  
7  
8  
9  
10  
11  
12  
13  
14  
15  
16  
17  
18  
19  
20  
21  
22  
23  
24  
25  
26  
27  
28  
29  
30  
31  
32  
33  
34  
35  
36  
37  
38  
39  
40  
41  
42  
43  
44  
45  
46  
47  
48  
49  
50  
51  
52  
53  
54  
55  
56  
57  
58  
59  
60

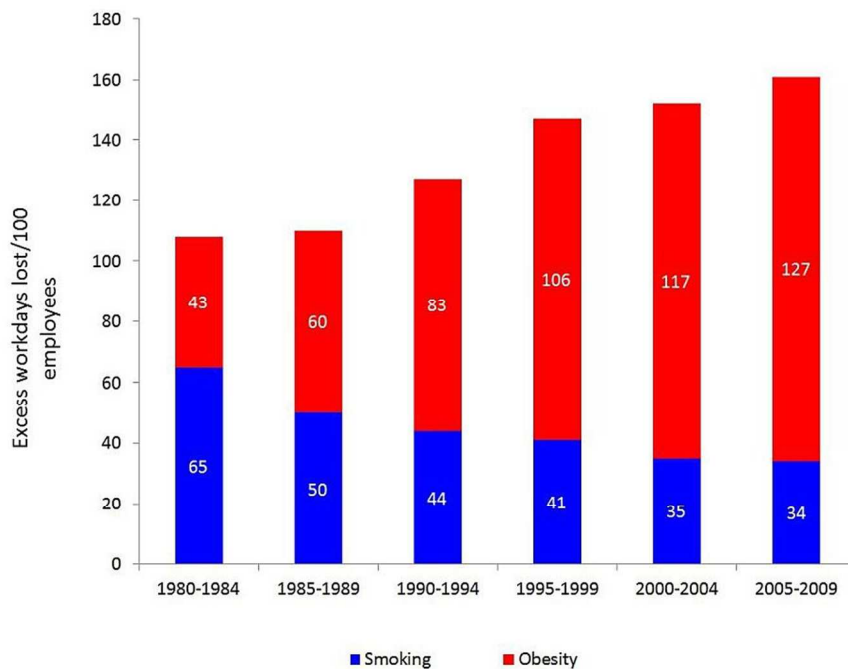

90x64mm (300 x 300 DPI)

View only
